# Supplementary material for: Isolation and Molecular Characterization of Thirteen R2R3-MYB Transcription Factors from Epimedium sagittatum
Source: Int J Mol Sci. 2012 Dec 27;14(1):594–610. doi: 10.3390/ijms14010594 (PMC3565284; doi:10.3390/ijms14010594)
Supplement: Supplementary File 1 — Supplemental Table (PDF, 124 KB) [file ijms-14-00594-s001.pdf]

## Supplementary Information

**Table S1.** Length of epimedii R2R3-MYB coding sequences and introns with their predicted splice junctions <sup>a</sup>.

| Gene name      | Length (bp)          |                       | Intron I (phase 1) |                | Intron II (phase 2) |               |               |                       |
|----------------|----------------------|-----------------------|--------------------|----------------|---------------------|---------------|---------------|-----------------------|
|                | Coding Sequence (bp) | Protein Sequence (aa) | Intron I (bp)      | Intron II (bp) | 5'Splice site       | 3'Splice site | 5'Splice site | 3'Splice site         |
| <i>EsMYB1</i>  | 888                  | 295                   | 112                | 90             | GCAG:GTATTC         | ATTCAG:GT     | AACAA:GTAAGA  | TTTC <b>ITG</b> :GTGG |
| <i>EsMYB2</i>  | 1323                 | 440                   | 121                | 89             | GCAG:GTAAGG         | TTTCAG:GT     | AATAG:GTATTA  | CACCAG:GTGG           |
| <i>EsMYB3</i>  | 927                  | 308                   | none               | none           | none                | none          | none          | none                  |
| <i>EsMYB4</i>  | 1068                 | 355                   | 141                | 140            | ACTG:GTGAAA         | TTGAAG:GA     | AACAA:GTAATT  | GAGCAG:ATGG           |
| <i>EsMYB5</i>  | 735                  | 244                   | 85                 | 88             | GCAG:GTAAAT         | CTTCAG:GT     | AACAA:GTGAGT  | TCGCAG:GTGG           |
| <i>EsMYB6</i>  | 1101                 | 366                   | 92                 | 98             | GCAG:GTAAC          | TTGCAG:GA     | AACAG:GTATTG  | TTGTAG:GTGG           |
| <i>EsMYB7</i>  | 804                  | 267                   | 272                | 93             | GCCG:GTAAGA         | GTGCAG:GT     | AACAG:GTGCTT  | GTTTAG:ATGG           |
| <i>EsMYB8</i>  | 897                  | 298                   | none               | 280            | none                | none          | CACAA:GTAAGT  | TTCCAG:GCTC           |
| <i>EsMYB9</i>  | 873                  | 290                   | none               | 107            | none                | none          | AACAG:GTGATT  | TTGCAG:ATGG           |
| <i>EsMYB10</i> | 903                  | 300                   | 83                 | 135            | GCAG:GTAAAG         | ACGTAG:GT     | AACAG:GTATTA  | TTGTAG:ATGG           |
| <i>EsMYB11</i> | 801                  | 266                   | 117                | 66             | GCAG:GTAAAT         | TTTCAG:GT     | AGCAA:GTGAGT  | TTACAG:GTGG           |
| <i>EsMYB12</i> | 783                  | 260                   | 109                | 159            | GCAG:GTTGGT         | CCTCAG:GT     | AACAG:GTGCGA  | TTATAG:GTGG           |
| <i>EsMYB13</i> | 1053                 | 350                   | none               | none           | none                | none          | none          | none                  |

<sup>a</sup> Coding sequences indicate the length in nucleotides from the translation start codon to the stop codon and protein sequences correspond to the deduced amino acid length of coding sequence. Intron I and II represent the first and second introns, respectively. Intron phase refers to the position in a codon where the intron is inserted: after the first nucleotide (phase 1) or after the second nucleotide (phase 2) of a codon. Italic nucleotide pairs GT and AG (except *EsMYB1* intron II, bold and italic TG shown) represent the beginning and the end of the introns, respectively.

**Table S2.** Blast analysis of epimedii R2R3-MYB proteins in *Arabidopsis* nr protein database.

| Protein name | Amino acid | Top blastp in <i>Arabidopsis</i> | Accession number | Score | Query coverage | E value                |
|--------------|------------|----------------------------------|------------------|-------|----------------|------------------------|
| EsMYB1       | 295        | MYB4                             | NP_195574.1      | 277   | 92%            | $2.00 \times 10^{-74}$ |
| EsMYB2       | 440        | MYB61                            | NP_172425.2      | 317   | 99%            | $2.00 \times 10^{-86}$ |
| EsMYB3       | 308        | MYB73                            | NP_195443.1      | 249   | 94%            | $6.00 \times 10^{-66}$ |
| EsMYB4       | 355        | MYB60                            | NP_172358.1      | 255   | 58%            | $8.00 \times 10^{-68}$ |
| EsMYB5       | 244        | MYB3                             | NP_564176.2      | 177   | 60%            | $3.00 \times 10^{-44}$ |
| EsMYB6       | 366        | MYB86                            | NP_850879.1      | 249   | 43%            | $4.00 \times 10^{-66}$ |
| EsMYB7       | 267        | TT2 (MYB123)                     | NP_198405.1      | 181   | 59%            | $2.00 \times 10^{-45}$ |
| EsMYB8       | 298        | MYB                              | NP_200698.1      | 295   | 89%            | $7.00 \times 10^{-80}$ |
| EsMYB9       | 290        | MYB5                             | NP_187963.1      | 270   | 81%            | $2.00 \times 10^{-72}$ |
| EsMYB10      | 300        | TT2 (MYB123)                     | NP_198405.1      | 195   | 55%            | $7.00 \times 10^{-50}$ |
| EsMYB11      | 266        | MYB102                           | NP_567626.1      | 177   | 53%            | $3.00 \times 10^{-44}$ |
| EsMYB12      | 260        | MYB4                             | NP_195574.1      | 237   | 83%            | $2.00 \times 10^{-62}$ |
| EsMYB13      | 350        | MYB44                            | NP_201531.1      | 272   | 97%            | $1.00 \times 10^{-91}$ |

**Table S3.** Blast analysis of epimedii *R2R3-MYB* proteins in nr protein database excluding *Arabidopsis*.

| Protein name | Amino acid | Top blastp out <i>Arabidopsis</i>   | Accession number | Score | Query coverage | <i>E</i> value          |
|--------------|------------|-------------------------------------|------------------|-------|----------------|-------------------------|
| EsMYB1       | 295        | <i>Gossypium hirsutum</i> , MYB1    | AAA33067.1       | 302   | 99%            | $7.00 \times 10^{-80}$  |
| EsMYB2       | 440        | <i>Betula luminifera</i> , MYB-like | ACJ38663.1       | 433   | 99%            | $2.00 \times 10^{-119}$ |
| EsMYB3       | 308        | <i>Glycine max</i> , MYB112         | ABH02852.1       | 292   | 93%            | $7.00 \times 10^{-77}$  |
| EsMYB4       | 355        | <i>Vitis vinifera</i> , MYB60       | XP_002271738.1   | 306   | 95%            | $3.00 \times 10^{-81}$  |
| EsMYB5       | 244        | <i>Vitis vinifera</i> , MybPA2      | ACK56131.1       | 178   | 78%            | $1.00 \times 10^{-42}$  |
| EsMYB6       | 366        | <i>Ricinus communis</i> , MYB       | XP_002511336.1   | 327   | 99%            | $2.00 \times 10^{-87}$  |
| EsMYB7       | 267        | <i>Lotus japonicus</i> , TT2a       | BAG12893.1       | 221   | 86%            | $2.00 \times 10^{-55}$  |
| EsMYB8       | 298        | <i>Antirrhinum majus</i> , DIV      | AAL78741.1       | 358   | 99%            | $1.00 \times 10^{-96}$  |
| EsMYB9       | 290        | <i>Vitis vinifera</i> , MYB5b       | AAX51291.1       | 303   | 91%            | $5.00 \times 10^{-80}$  |
| EsMYB10      | 300        | <i>Gossypium hirsutum</i> , MYB10   | AAK19615.1       | 258   | 90%            | $1.00 \times 10^{-66}$  |
| EsMYB11      | 266        | <i>Malus x domestica</i> , MYB11    | AAZ20431.1       | 181   | 62%            | $1.00 \times 10^{-43}$  |
| EsMYB12      | 260        | <i>Vitis vinifera</i> , MYBC2-L1    | ABW34393.1       | 332   | 85%            | $9.00 \times 10^{-89}$  |
| EsMYB13      | 350        | <i>Glycine max</i> , MYB50          | ABH02824.1       | 358   | 97%            | $9.00 \times 10^{-125}$ |

**Table S4.** List of primers used for conserved domain and the full-length cDNA amplification of epimedii *R2R3-MYB* genes.

| Gene name      | Degenerate primers for conserved domain (Forward/Reverse) <sup>a</sup>                                               | Gene specific primers for full-length cDNA (Forward/Reverse)        | Length of FLC (ORF) <sup>b</sup> (bp) |
|----------------|----------------------------------------------------------------------------------------------------------------------|---------------------------------------------------------------------|---------------------------------------|
| <i>EsMYB1</i>  | 5' TGY TGY GAR AAR GCN CAY AYN AA 3'<br>5' TT CCA RTA RTT YTT NAY YTC RTT 3'                                         | 5' GACATTTCCCCCAGTTTTCCT 3'<br>5' AATGATTACAAGTAGGTATTTGAACA 3'     | 1122 (888)                            |
| <i>EsMYB2</i>  | 5' CAY TCN TGY TGY TWY AAR CAR AA 3'<br>5' CAY AGY TGY TGY TWY AAR CAR AA 3'<br>5' AR RTT YTT DAT YTC RTT RTC NGT 3' | 5' GAGACTCTTCTGCTCTTGCTGAT 3'<br>5' GCCTTTATTCAAGCCTTTCAAATT 3'     | 1460 (1323)                           |
| <i>EsMYB3</i>  | 5' AAR GGN CCN TGG TCN CCN GAR GA 3'<br>5' AAR GGN CCN TGG ASN CCN GAR GA 3'<br>5' AT NGT NGC CCA YTT RTT NCC RAA 3' | 5' GCTCACAACCAACCCTCCCCTT 3'<br>5' CTCAAAACCCCAAACTATCTCCATCA 3'    | 1085 (927)                            |
| <i>EsMYB4</i>  | 5' AAR GGN CCN TGG ASN CCN GAR GA 3'<br>5' CCA RTA RTT YTT DAT RTC RTT RTC 3'                                        | 5' AGCTAGCTGGTGCAAAAGGAATTG 3'<br>5' TGAAGATACCCAAAGGTCCCAGAAC 3'   | 1297 (1068)                           |
| <i>EsMYB5</i>  |                                                                                                                      | 5' GCAAAACAGAGGGAAAAAATAAT 3'<br>5' CTGCAGTTTATTGAAAATTTCACA 3'     | 822 (735)                             |
| <i>EsMYB6</i>  |                                                                                                                      | 5' AGATTTGCGTAAAAACCACTTGAT 3'<br>5' CGCAGAATAGAAGAATCCATTTCAC 3'   | 1563 (1101)                           |
| <i>EsMYB7</i>  |                                                                                                                      | 5' GACAGTAGTCTTTCAAGCCTAAGAAATG 3'<br>5' TACTCTGCAGGAACGGAAGACAC 3' | 820 (804)                             |
| <i>EsMYB8</i>  |                                                                                                                      | 5' GGGATGGAAATTCAGTCACCAAG 3'<br>5' ATGATTGCGGTGCAATACATAATTGC 3'   | 1216 (897)                            |
| <i>EsMYB9</i>  |                                                                                                                      | 5' CTGCCGTGCTGTGTAACATAGA 3'<br>5' TCAATGTAACCTATGACAACAAGAAGC 3'   | 1095 (873)                            |
| <i>EsMYB10</i> |                                                                                                                      | 5' GGAAATGGGAAGAAGCCCCTGTTGT 3'<br>5' TGATCTATTTACCAAACATTGAATC 3'  | 986 (903)                             |

Table S4. Cont.

| Gene name      | Degenerate primers for conserved domain (Forward/Reverse) <sup>a</sup> | Gene specific primers for full-length cDNA (Forward/Reverse)       | Length of FLC (ORF) <sup>b</sup> (bp) |
|----------------|------------------------------------------------------------------------|--------------------------------------------------------------------|---------------------------------------|
| <i>EsMYB11</i> |                                                                        | 5' CAGAGAAAGGAAAAGAAAATGGTT 3'<br>5' AGAAAAAATTTTGATTTTATTACACC 3' | 878 (801)                             |
| <i>EsMYB12</i> |                                                                        | 5' AGTCTGTCTGTTGGGTGTGGATG 3'<br>5' TCACTGCTTCAGAAATGCTTACCAC 3'   | 1199 (783)                            |
| <i>EsMYB13</i> |                                                                        | 5' CCTCCTCTATACAAACCTCCTACCTT 3'<br>5' CGATTGCTCTCTGATTTCCTGC 3'   | 1303 (1053)                           |

<sup>a</sup> two forward degenerate primers of *EsMYB2* and *EsMYB3* are mixed as the forward primers for conserved domain PCR, respectively. <sup>b</sup> FLC indicates the full-length cDNA, ORF in the bracket indicates the open reading frame.

Table S5. List of primers used for qPCR assay of *epimedii R2R3-MYB* genes.

| Gene name      | Primers (forward/reverse)                                 | Length of amplicon (bp) |
|----------------|-----------------------------------------------------------|-------------------------|
| <i>EsMYB1</i>  | 5' CCTTCCATCATCTTCTTCTTC 3'<br>5' TTCTTCTTCTGTTGCTGTTG 3' | 127                     |
| <i>EsMYB2</i>  | 5' AATCCTTCCAACCACAATG 3'<br>5' CTGCTTCCACTATTACTTCTG 3'  | 144                     |
| <i>EsMYB3</i>  | 5' CCTACTCCTACTGCTGTG 3'<br>5' TGCTTCTCCTTCTCCTTATC 3'    | 125                     |
| <i>EsMYB4</i>  | 5' AAGTGCGAGGAGTTAGTC 3'<br>5' ATGGTAGGTAGTTTCAGTTG 3'    | 141                     |
| <i>EsMYB5</i>  | 5' AAAATAATGGGTAGGAAGCC 3'<br>5' AGCAACAGATTTCAGCAAG 3'   | 96                      |
| <i>EsMYB6</i>  | 5' TCATCTCCTTCTCCTCCATTC 3'<br>5' CCCATTTTACGACGACAG 3'   | 106                     |
| <i>EsMYB7</i>  | 5' CAGACATCAAGAGAGGAAAC 3'<br>5' CAGCAATCAGAGACCATC 3'    | 93                      |
| <i>EsMYB8</i>  | 5' GTCTCTGGAACAATCTGC 3'<br>5' CCGTAAGGTGGAACAAAC 3'      | 147                     |
| <i>EsMYB9</i>  | 5' ATACCAACAACCCAAACC 3'<br>5' CTTAGCAATGACTCCAGAAC 3'    | 77                      |
| <i>EsMYB10</i> | 5' TGATAGCAGGACGACTTC 3'<br>5' TGGTATAGGTTGTGGTTGG 3'     | 173                     |
| <i>EsMYB11</i> | 5' TATGGGCGACTTTGCTAC 3'<br>5' CCTCTCCTCATTTTCATCTCC 3'   | 94                      |
| <i>EsMYB12</i> | 5' TCCTTCATCTTCATCCTCTTC 3'<br>5' CATCCTTCGCCATTTAGTTG 3' | 170                     |
| <i>EsMYB13</i> | 5' GGTTGTTTCTTAAGACTG 3'<br>5' GATGAGATGATTGTTGTTGTTG 3'  | 148                     |
| <i>EsActin</i> | 5' CACCACAACCTGCTGAACG 3'<br>5' AATCGCTCTGCTCCAATG 3'     | 165                     |
